# Supplementary material for: Single-step microwave synthesis of a novel ternary nanocomposite as an efficient luminophore and boron nitride quantum dots as a new coreactant for a cathodic ECL monitoring of chlorpyrifos
Source: Royal Society of Chemistry journal article supplement (doi:10.1039/d1ay01687c), 2022-01-01
Supplement: d1ay01687c1.pdf [file d1ay01687c1.pdf]

## Supplementary file

# Single step microwave synthesis of novel ternary nanocomposite as an efficient luminophore and boron nitride quantum dots as a new coreactant for cathodic ECL monitoring of chlorpyrifos

Mohammad Ali Kamyabi\*, Mohsen Moharramnezhad

Electroanalytical Chemistry Laboratory, Department of Chemistry, Faculty of Science, University of Zanjan, Postal Code 45371-38791, Zanjan, Iran

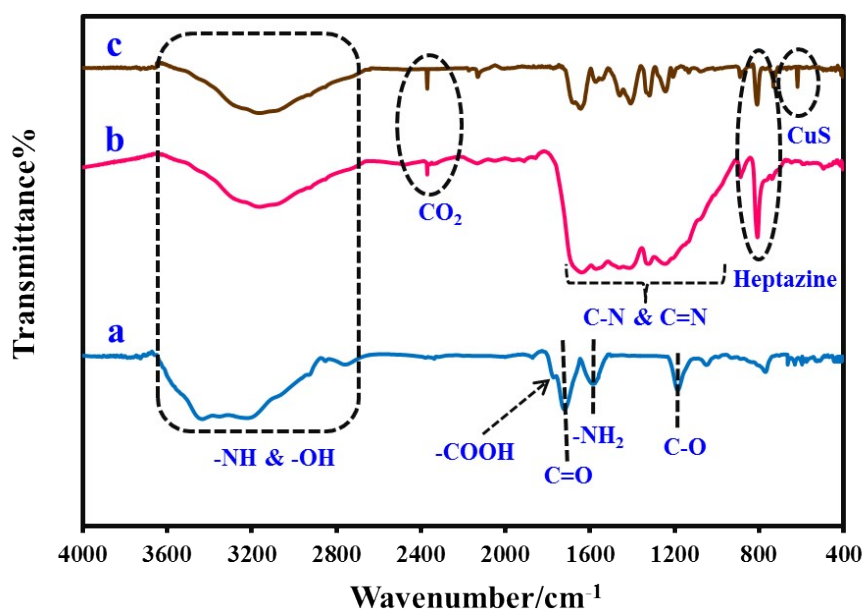

Fig.S1. FT-IR spectra of (a) CQDs, (b) g-C<sub>3</sub>N<sub>4</sub>NS, and (c) CuS/CQDs/g-C<sub>3</sub>N<sub>4</sub>NS.

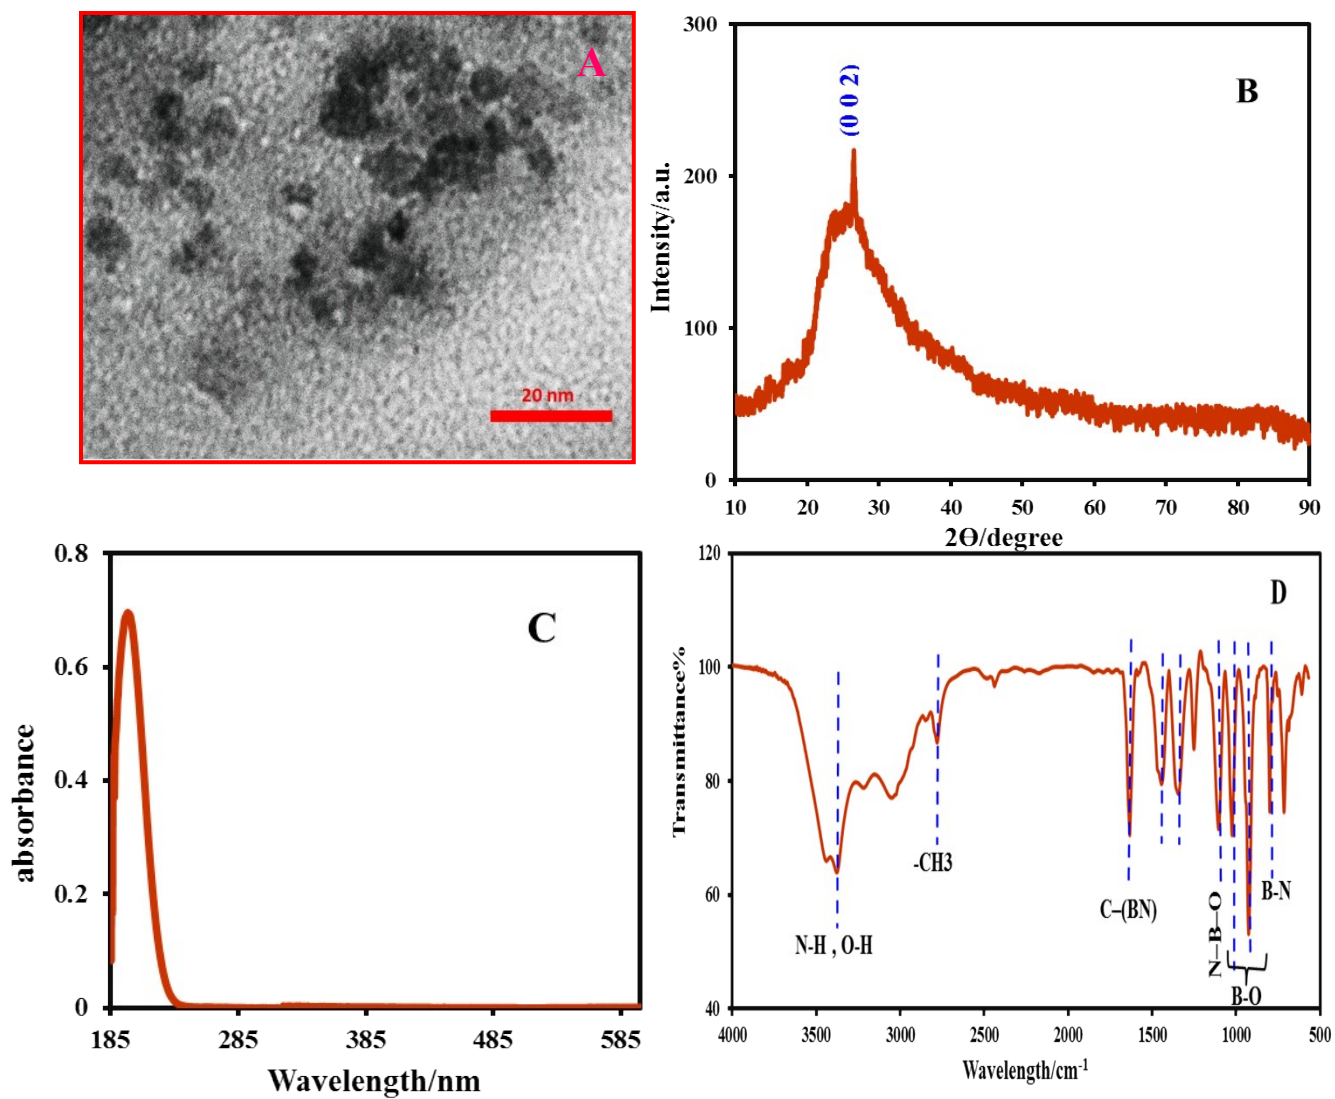

Fig.S2. TEM image (A), XRD pattern (B), UV-vis absorption (C), and FT-IR spectra (D) of prepared BNQDs.

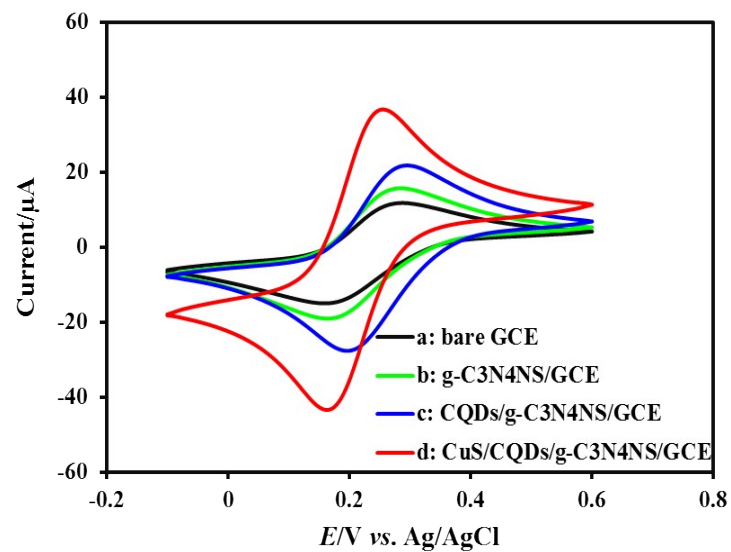

**Fig.S3.** CV curves of (a) bare GCE, (b) g-C<sub>3</sub>N<sub>4</sub>NS/GCE, (c) CQDs/g-C<sub>3</sub>N<sub>4</sub>NS/GCE and CuS/CQDs/g-C<sub>3</sub>N<sub>4</sub>NS/GCE in 0.1 M NaOH containing 1.0 mM Fe(CN)<sub>6</sub><sup>4-</sup> at a scan rate of 100 mV s<sup>-1</sup>.
